# Supplementary material for: Mitochondrial Genome of Strophopteryx fasciata (Plecoptera: Taeniopterygidae), with a Phylogenetic Analysis of Nemouroidea
Source: MDPI journal article supplement (doi:10.3390/genes13071116), 2022-06-22
Supplement: s1 [file s1]

## Supplementary Materials

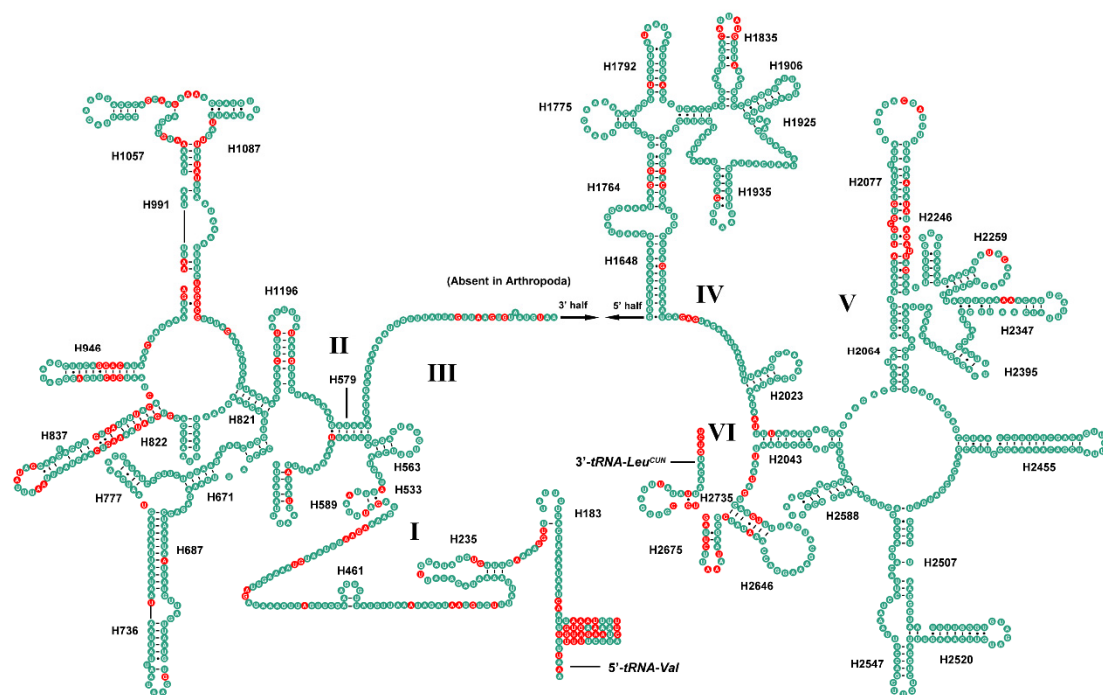

**Figure S1.** Predicted secondary structure of the *lrRNA* gene in *S. fasciata* mitogenome.

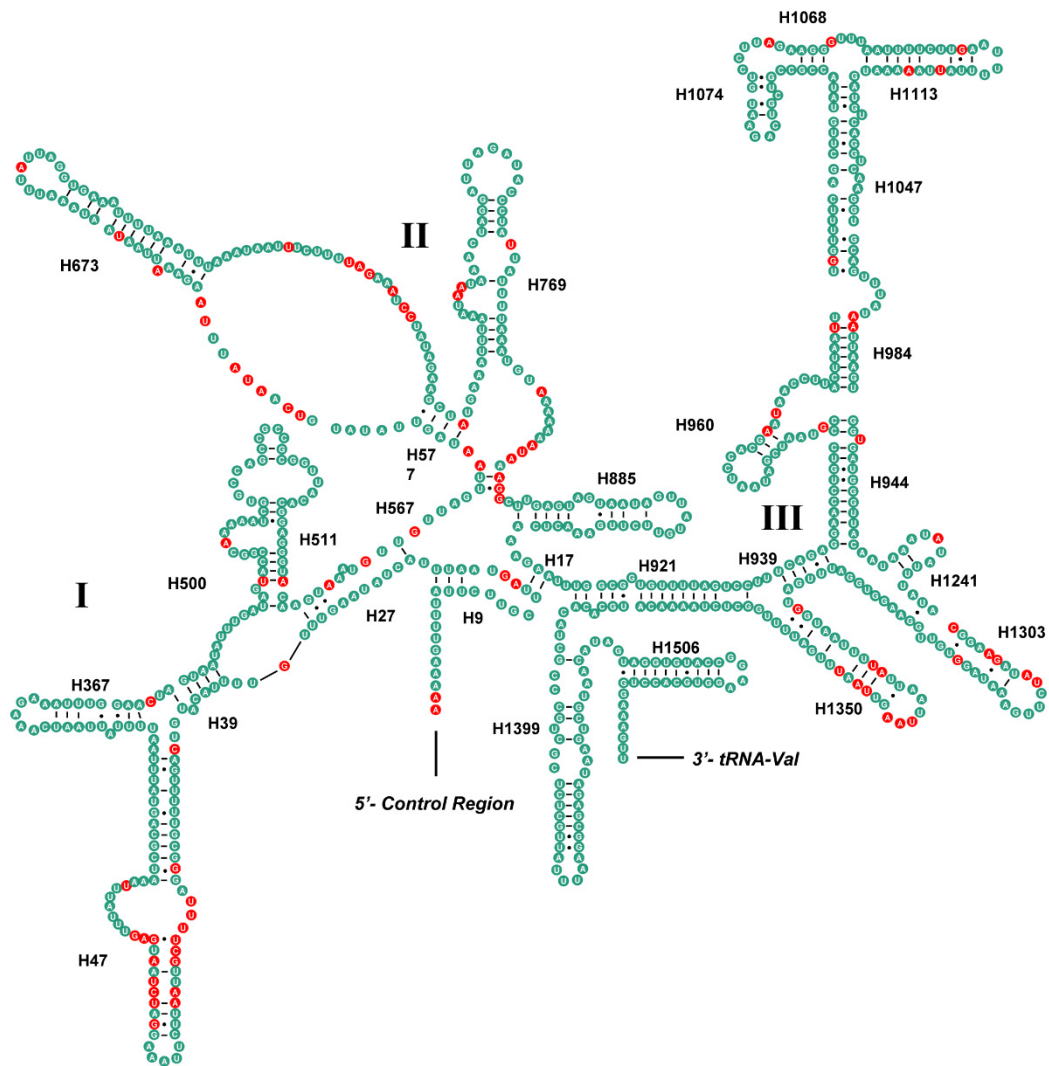

**Figure S2.** Predicted secondary structure of the *srRNA* gene in *S. fasciata* mitogenome.

**Table S1.** Organization of the *S. fasciata* mitochondrial genome.

| Gene                           | Direction | Location      | Size  | Anticodon<br>start/stop codon | or<br>Intergenic<br>nucleotides |
|--------------------------------|-----------|---------------|-------|-------------------------------|---------------------------------|
| <i>tRNA<sup>Ile</sup></i>      | F         | 1-67          | 67    | 30-32 GAT                     |                                 |
| <i>tRNA<sup>Gln</sup></i>      | R         | 65-133        | 69    | 101-103 TTG                   | -3                              |
| <i>tRNA<sup>Met</sup></i>      | F         | 133-203       | 71    | 163-165 CAT                   | -1                              |
| <i>ND2</i>                     | F         | 204-1,238     | 1,035 | ATG/TAA                       | 0                               |
| <i>tRNA<sup>Trp</sup></i>      | F         | 1,237-1,304   | 68    | 1,267-1,269 TCA               | -2                              |
| <i>tRNA<sup>Cys</sup></i>      | R         | 1,297-1,361   | 65    | 1,329-1,331 GCA               | -8                              |
| <i>tRNA<sup>Tyr</sup></i>      | R         | 1,362-1,427   | 66    | 1,394-1,396 GTA               | 0                               |
| <i>COI</i>                     | F         | 1,420-2,959   | 1,540 | ATT/T-                        | -8                              |
| <i>tRNA<sup>Leu(UUR)</sup></i> | F         | 2,960-3,025   | 66    | 2,989-2,991 TAA               | 0                               |
| <i>COII</i>                    | F         | 3,031-3,718   | 688   | ATG/T-                        | 5                               |
| <i>tRNA<sup>Lys</sup></i>      | F         | 3,719-3,789   | 71    | 3,749-3,751 CTT               | 0                               |
| <i>tRNA<sup>Asp</sup></i>      | F         | 3,789-3,856   | 68    | 3,818-3,820 GTC               | -1                              |
| <i>ATP8</i>                    | F         | 3,857-4,015   | 159   | ATT/TAA                       | 0                               |
| <i>ATP6</i>                    | F         | 4,009-4,686   | 678   | ATG/TAA                       | -7                              |
| <i>COIII</i>                   | F         | 4,686-5,474   | 789   | ATG/TAA                       | -1                              |
| <i>tRNA<sup>Gly</sup></i>      | F         | 5,474-5,539   | 66    | 5,503-5,505 TCC               | -1                              |
| <i>ND3</i>                     | F         | 5,540-5,893   | 354   | ATT/TAG                       | 0                               |
| <i>tRNA<sup>Ala</sup></i>      | F         | 5,892-5,955   | 64    | 5,921-5,923 TGC               | -2                              |
| <i>tRNA<sup>Arg</sup></i>      | F         | 5,956-6,019   | 64    | 5,985-5,987 TCG               | 0                               |
| <i>tRNA<sup>Asn</sup></i>      | F         | 6,020-6,087   | 68    | 6,050-6,052 GTT               | 0                               |
| <i>tRNA<sup>Ser(AGN)</sup></i> | F         | 6,088-6,155   | 68    | 6,114-6,116 GCT               | 0                               |
| <i>tRNA<sup>Glu</sup></i>      | F         | 6,157-6,221   | 65    | 6,186-6,188 TTC               | 1                               |
| <i>tRNA<sup>Phe</sup></i>      | R         | 6,224-6,290   | 67    | 6,256-6,258 GAA               | 2                               |
| <i>ND5</i>                     | R         | 6,291-8,022   | 1,732 | ATG/T-                        | 0                               |
| <i>tRNA<sup>His</sup></i>      | R         | 8,023-8,090   | 68    | 8,058-8,060 GTG               | 0                               |
| <i>ND4</i>                     | R         | 8,090-9,430   | 1,341 | ATG/TAA                       | -1                              |
| <i>ND4L</i>                    | R         | 9,424-9,720   | 297   | ATG/TAA                       | -7                              |
| <i>tRNA<sup>Thr</sup></i>      | F         | 9,723-9,787   | 65    | 9753-9755 TGT                 | 2                               |
| <i>tRNA<sup>Pro</sup></i>      | R         | 9,788- 9,853  | 66    | 9,821-9,823 TGG               | 0                               |
| <i>ND6</i>                     | F         | 9,856-10,380  | 525   | ATG/TAA                       | 2                               |
| <i>CytB</i>                    | F         | 10,380-11,516 | 1,137 | ATG/TAG                       | -1                              |
| <i>tRNA<sup>Ser(UCN)</sup></i> | F         | 11,515-11,584 | 70    | 11,546-11,548 TGA             | -2                              |
| <i>ND1</i>                     | R         | 11,601-12,551 | 951   | TTG/TAG                       | 16                              |
| <i>tRNA<sup>Leu(CUN)</sup></i> | R         | 12,553-12,618 | 66    | 12,587-12,589 TAG             | 1                               |
| <i>lrRNA</i>                   | R         | 12,619-13,952 | 1,334 |                               | 0                               |
| <i>tRNA<sup>Val</sup></i>      | R         | 13,953-14,023 | 71    | 13,988-13,990 TAC             | 0                               |
| <i>srRNA</i>                   | R         | 14,024-14,820 | 797   |                               | 0                               |
| <i>Control region</i>          |           | 14,821-15,527 | 707   |                               | 0                               |

**Table S2.** Codon number and RSCU in the *S. fasciata* mitochondrial PCGs.

| Codon  | Count | RSCU |
|--------|-------|------|--------|-------|------|--------|-------|------|--------|-------|------|
| UUU(F) | 227   | 1.44 | UCU(S) | 94    | 2.24 | UAU(Y) | 99    | 1.29 | UGU(C) | 36    | 1.64 |
| UUC(F) | 89    | 0.56 | UCC(S) | 17    | 0.4  | UAC(Y) | 55    | 0.71 | UGC(C) | 8     | 0.36 |
| UUA(L) | 343   | 3.18 | UCA(S) | 90    | 2.14 | UAA(*) | 0     | 0    | UGA(W) | 94    | 1.81 |
| UUG(L) | 62    | 0.57 | UCG(S) | 9     | 0.21 | UAG(*) | 0     | 0    | UGG(W) | 10    | 0.19 |
| CUU(L) | 117   | 1.08 | CCU(P) | 78    | 2.11 | CAU(H) | 57    | 1.5  | CGU(R) | 19    | 1.23 |
| CUC(L) | 26    | 0.24 | CCC(P) | 20    | 0.54 | CAC(H) | 19    | 0.5  | CGC(R) | 5     | 0.32 |
| CUA(L) | 86    | 0.8  | CCA(P) | 38    | 1.03 | CAA(Q) | 70    | 1.73 | CGA(R) | 26    | 1.68 |
| CUG(L) | 14    | 0.13 | CCG(P) | 12    | 0.32 | CAG(Q) | 11    | 0.27 | CGG(R) | 12    | 0.77 |
| AUU(I) | 241   | 1.7  | ACU(T) | 86    | 1.59 | AAU(N) | 117   | 1.5  | AGU(S) | 65    | 1.55 |
| AUC(I) | 42    | 0.3  | ACC(T) | 34    | 0.63 | AAC(N) | 39    | 0.5  | AGC(S) | 21    | 0.5  |
| AUA(I) | 127   | 1.36 | ACA(T) | 82    | 1.52 | AAA(K) | 22    | 0.6  | AGA(S) | 40    | 0.95 |
| AUG(M) | 60    | 0.64 | ACG(T) | 14    | 0.26 | AAG(K) | 51    | 1.4  | AGG(S) | 0     | 0    |
| GUU(V) | 99    | 1.72 | GCU(A) | 119   | 2.1  | GAU(D) | 48    | 1.39 | GGU(G) | 61    | 1    |
| GUC(V) | 33    | 0.57 | GCC(A) | 45    | 0.79 | GAC(D) | 21    | 0.61 | GGC(G) | 13    | 0.21 |
| GUA(V) | 74    | 1.29 | GCA(A) | 54    | 0.95 | GAA(E) | 59    | 1.55 | GGA(G) | 97    | 1.58 |
| GUG(V) | 24    | 0.42 | GCG(A) | 9     | 0.16 | GAG(E) | 17    | 0.45 | GGG(G) | 74    | 1.21 |
